# Supplementary material
Source: HighWire-hosted journal article supplement (https://www.canjsurg.ca/highwire/filestream/96790/field_highwire_adjunct_files/0/cjs-004819-1-at.pdf)
Supplement: cjs-004819-1-at.pdf [file cjs-004819-1-at.pdf]

**Appendix 1** to Mohtashami S, Safa N, Guadagno E, et al. Derivation of a complication burden score based on disability-adjusted life years to assess patient burden following surgery: a pilot study. *Can J Surg* 2020.

DOI: 10.1503/cjs.004819

Copyright © 2020 The Author(s) or their employer(s).

To receive this resource in an accessible format, please contact us at [cmajgroup@cmaj.ca](mailto:cmajgroup@cmaj.ca).

*Online appendices are unedited and posted as supplied by the authors.*

**Table 1: Definition of the health states used to derive disability weights (DWs) [19]**

|                         |                                                                                                                                                                                  |
|-------------------------|----------------------------------------------------------------------------------------------------------------------------------------------------------------------------------|
| Inguinal hernia         | Mild symptomatic inguinal, femora and abdominal hernia                                                                                                                           |
| Wound infection         | Abscess and other bacterial skin disease                                                                                                                                         |
| Infertility             | Primary male infertility                                                                                                                                                         |
| Nausea &/or vomiting    | Chronic abdominal pain due to congenital malformations of the abdominal wall-patient has some pain in the belly that causes nausea but does not interfere with daily activities. |
| Sepsis                  | Severe infection due to neonatal sepsis and other neonatal condition, acute episode, severe                                                                                      |
| Small bowel obstruction | Paralytic ileus and intestinal obstruction-abdominopelvic problem                                                                                                                |
| Anemia                  | Moderate anemia due to gastritis and duodenitis                                                                                                                                  |

**Appendix 1** to Mohtashami S, Safa N, Guadagno E, et al. Derivation of a complication burden score based on disability-adjusted life years to assess patient burden following surgery: a pilot study. *Can J Surg* 2020.

DOI: 10.1503/cjs.004819

*Online appendices are unedited and posted as supplied by the authors.*

## *Pediatric Inguinal Hernia PostOp Complications*

### Contact Information

Dr. Poenaru & Sadaf Mohtashami

### Databases Searched

#### **Medline [Ovid] (May 15, 2018)**

Ovid MEDLINE(R) and Epub Ahead of Print, In-Process & Other Non-Indexed Citations, Ovid MEDLINE(R) Daily <1946 to Present>

|    |                                                                                                                                                                                                                                                                              |         |
|----|------------------------------------------------------------------------------------------------------------------------------------------------------------------------------------------------------------------------------------------------------------------------------|---------|
| 1  | Hernia, Inguinal/                                                                                                                                                                                                                                                            | 12895   |
| 2  | exp hernia/ or (herni* or enteroce?l*).tw,kf.                                                                                                                                                                                                                                | 96459   |
| 3  | Herniorrhaphy/                                                                                                                                                                                                                                                               | 6851    |
| 4  | (hernioplast* or hernio-plast* or herniorrhaph* or herniotom*).tw,kf.                                                                                                                                                                                                        | 4330    |
| 5  | Inguinal Canal/ or inguin*.tw,kf.                                                                                                                                                                                                                                            | 28267   |
| 6  | (2 or 3 or 4) and 5                                                                                                                                                                                                                                                          | 13900   |
| 7  | 1 or 6                                                                                                                                                                                                                                                                       | 16885   |
| 8  | exp pediatrics/ or adolescent/ or exp child/ or exp infant/                                                                                                                                                                                                                  | 3309928 |
| 9  | (newborn* or new-born* or neonat* or neo-nat* or infan* or child* or adolesc* or paediatr* or pediatr* or baby* or babies* or toddler* or kid or kids or boy* or girl* or juvenile* or teen* or youth* or pubescen* or preadolesc* or prepubesc* or preteen or tween).tw,kf. | 2233559 |
| 10 | (pediatr* or paediatr*).jw.                                                                                                                                                                                                                                                  | 525415  |
| 11 | 8 or 9 or 10                                                                                                                                                                                                                                                                 | 4022940 |
| 12 | 7 and 11                                                                                                                                                                                                                                                                     | 5300    |
| 13 | Animals/ not (Animals/ and Humans/)                                                                                                                                                                                                                                          | 4426113 |
| 14 | ((animal or animals or canine* or cat or cats or dog or dogs or feline or hamster* or mice or monkey or monkeys or mouse or murine or pig or pigs or piglet* or porcine or primate* or rabbit* or rats or rat or rodent* or sheep*) not (human* or patient*)).ti,kf.         | 2010801 |
| 15 | 12 not (13 or 14)                                                                                                                                                                                                                                                            | 5267    |
| 16 | limit 12 to (english or french)                                                                                                                                                                                                                                              | 4341    |
| 17 | limit 16 to yr="2008 -Current"                                                                                                                                                                                                                                               | 1667    |
| 18 | remove duplicates from 17                                                                                                                                                                                                                                                    | 1659    |
| 19 | exp Postoperative Complications/                                                                                                                                                                                                                                             | 493383  |

**Appendix 1** to Mohtashami S, Safa N, Guadagno E, et al. Derivation of a complication burden score based on disability-adjusted life years to assess patient burden following surgery: a pilot study. *Can J Surg* 2020.

DOI: 10.1503/cjs.004819

*Online appendices are unedited and posted as supplied by the authors.*

|    |                                                                                                                                                                                                                                                                                                                                                                     |         |
|----|---------------------------------------------------------------------------------------------------------------------------------------------------------------------------------------------------------------------------------------------------------------------------------------------------------------------------------------------------------------------|---------|
| 20 | ((postop* or post-op* or ((post or after or following) adj3 (surger* or surgic* or procedure* or operat* or repair* or laparoscop* or laparotom* or resect* or sutureless*))) adj5 (complicat* or problem* or pain* or chronic* or injury or injuries or vomit* or emes?s or nausea* or readmission* or re-admission* or ((length or duration) adj1 stay*))).tw,kf. | 162676  |
| 21 | exp Recurrence/                                                                                                                                                                                                                                                                                                                                                     | 169967  |
| 22 | (recur* or relaps* or recrud* or reoccur*).tw,kf.                                                                                                                                                                                                                                                                                                                   | 655734  |
| 23 | Patient Readmission/                                                                                                                                                                                                                                                                                                                                                | 13143   |
| 24 | or/19-23                                                                                                                                                                                                                                                                                                                                                            | 1254984 |
| 25 | 18 and 24                                                                                                                                                                                                                                                                                                                                                           | 708     |
| 26 | Postoperative Care/                                                                                                                                                                                                                                                                                                                                                 | 56550   |
| 27 | exp Postoperative Period/                                                                                                                                                                                                                                                                                                                                           | 48707   |
| 28 | (postop* or post-op* or ((post or after or following) adj3 (surger* or surgic* or procedure* or operat* or repair* or laparoscop* or laparotom* or resect* or sutureless*))).tw,kf.                                                                                                                                                                                 | 877385  |
| 29 | 26 or 27 or 28                                                                                                                                                                                                                                                                                                                                                      | 918749  |
| 30 | 18 and 29                                                                                                                                                                                                                                                                                                                                                           | 664     |
| 31 | (ae or co).fs.                                                                                                                                                                                                                                                                                                                                                      | 3213366 |
| 32 | exp treatment outcome/                                                                                                                                                                                                                                                                                                                                              | 870330  |
| 33 | (outcome* or safe or safety or side effect* or undesirable effect* or treatment emergent or tolerabilit* or toxic* or adrs or (adverse adj2 (effect? or reaction? or event?))).tw,kf.                                                                                                                                                                               | 2761281 |
| 34 | Vas Deferens/                                                                                                                                                                                                                                                                                                                                                       | 8082    |
| 35 | exp Infertility/                                                                                                                                                                                                                                                                                                                                                    | 61200   |
| 36 | Testicular Hydrocele/                                                                                                                                                                                                                                                                                                                                               | 1733    |
| 37 | exp Wound Healing/                                                                                                                                                                                                                                                                                                                                                  | 114406  |
| 38 | exp Abscess/                                                                                                                                                                                                                                                                                                                                                        | 53807   |
| 39 | exp Respiratory Tract Diseases/                                                                                                                                                                                                                                                                                                                                     | 1240210 |
| 40 | exp testicular diseases/                                                                                                                                                                                                                                                                                                                                            | 37092   |
| 41 | Testis/ and Atrophy/                                                                                                                                                                                                                                                                                                                                                | 899     |
| 42 | exp Wound Infection/                                                                                                                                                                                                                                                                                                                                                | 43270   |
| 43 | exp pain/                                                                                                                                                                                                                                                                                                                                                           | 358221  |
| 44 | Ecchymosis/                                                                                                                                                                                                                                                                                                                                                         | 1221    |
| 45 | Scrotum/ and Edema/                                                                                                                                                                                                                                                                                                                                                 | 273     |
| 46 | (abscess* or pain* or cryptorchis* or orchitides or orchitis or hydrocele* or infertil* or scar or scars or scarring or cicatrix* or SSI or edema* or anasarca or dropsy or hydrops or stitch granuloma* or ecchymos?s* or (testis* adj2 (iatr?gen* or ascent* atroph* or trap*)) or                                                                                | 1131195 |

**Appendix 1** to Mohtashami S, Safa N, Guadagno E, et al. Derivation of a complication burden score based on disability-adjusted life years to assess patient burden following surgery: a pilot study. *Can J Surg* 2020.

DOI: 10.1503/cjs.004819

*Online appendices are unedited and posted as supplied by the authors.*

|    |                                                                                                                                                                                                                                                         |         |
|----|---------------------------------------------------------------------------------------------------------------------------------------------------------------------------------------------------------------------------------------------------------|---------|
|    | ((vas def* or bladder* or sperm* vessel*) adj2 (injury or injuries)) or (((wound* or surgic* site) adj2 infect*) or heal? or healing) or (respirator* adj2 (distress* or infect* or problem* or complicat*)) or ((umbilical or two) adj2 port?)).tw,kf. |         |
| 47 | Length of Stay/ and (31 or 33)                                                                                                                                                                                                                          | 45096   |
| 48 | or/31-47                                                                                                                                                                                                                                                | 7126844 |
| 49 | 30 and 48                                                                                                                                                                                                                                               | 593     |
| 50 | 25 or 49                                                                                                                                                                                                                                                | 832     |
| 51 | limit 50 to case reports                                                                                                                                                                                                                                | 59      |
| 52 | 50 not 51                                                                                                                                                                                                                                               | 773     |

## Additional Details

---

### Limits

---

- 2008-current
- Exclude Animals
- Pediatrics
- Exclude case reports, where possible

## Legend for Databases

---

Legends for Medline (Ovid), Embase (Ovid) & CINAHL (Ebsco) are available on our website:  
[http://www.muhclibraries.ca/Documents/Database\\_Legends.pdf](http://www.muhclibraries.ca/Documents/Database_Legends.pdf)

**Appendix 1** to Mohtashami S, Safa N, Guadagno E, et al. Derivation of a complication burden score based on disability-adjusted life years to assess patient burden following surgery: a pilot study. *Can J Surg* 2020.

DOI: 10.1503/cjs.004819

Online appendices are unedited and posted as supplied by the authors.

## Pediatric Intestinal Atresia & PostOp Complications

### Contact Information

Sadaf Mohtashami [sadaf.mohtashami@gmail.com](mailto:sadaf.mohtashami@gmail.com) & Dr. Dan Poenaru [dpoenaru@gmail.com](mailto:dpoenaru@gmail.com)

### Databases Searched

#### Medline [Ovid] (August 17, 2018)

Ovid MEDLINE(R) and Epub Ahead of Print, In-Process & Other Non-Indexed Citations, Ovid MEDLINE(R) Daily <1946 to Present>

|    |                                                                                                                                                                                                                                                                                                                                                                     |       |
|----|---------------------------------------------------------------------------------------------------------------------------------------------------------------------------------------------------------------------------------------------------------------------------------------------------------------------------------------------------------------------|-------|
| 1  | Intestinal Atresia/                                                                                                                                                                                                                                                                                                                                                 | 20    |
| 2  | ((((intestin* or jejun*) adj3 (atres* or atroph*)) or (apple adj1 peel adj2 (atres* or syndrom* or disorder))).tw,kf.                                                                                                                                                                                                                                               | 31    |
| 3  | 1 or 2                                                                                                                                                                                                                                                                                                                                                              | 43    |
| 4  | exp pediatrics/ or adolescent/ or exp child/ or exp infant/                                                                                                                                                                                                                                                                                                         | 33363 |
| 5  | (newborn* or new-born* or neonat* or neo-nat* or infan* or child* or adolesc* or paediatr* or pediater* or baby* or babies* or toddler* or kid or kids or boy* or girl* or juvenile* or teen* or youth* or pubescen* or preadolesc* or prepubesc* or preteen or tween).tw,kf.                                                                                       | 22590 |
| 6  | (pediatr* or paediatr*).jw.                                                                                                                                                                                                                                                                                                                                         | 5298  |
| 7  | 4 or 5 or 6                                                                                                                                                                                                                                                                                                                                                         | 40599 |
| 8  | 3 and 7                                                                                                                                                                                                                                                                                                                                                             | 25    |
| 9  | Animals/ not (Animals/ and Humans/)                                                                                                                                                                                                                                                                                                                                 | 44554 |
| 10 | ((animal or animals or canine* or cat or cats or dog or dogs or feline or hamster* or mice or monkey or monkeys or mouse or murine or pig or pigs or piglet* or porcine or primate* or rabbit* or rats or rat or rodent* or sheep*) not (human* or patient*)).ti,kf.                                                                                                | 20229 |
| 11 | 8 not (9 or 10)                                                                                                                                                                                                                                                                                                                                                     | 24    |
| 12 | limit 8 to (english or french)                                                                                                                                                                                                                                                                                                                                      | 20    |
| 13 | limit 12 to yr="2008 -Current"                                                                                                                                                                                                                                                                                                                                      | 6     |
| 14 | remove duplicates from 13                                                                                                                                                                                                                                                                                                                                           | 6     |
| 15 | exp Postoperative Complications/                                                                                                                                                                                                                                                                                                                                    | 4995  |
| 16 | ((postop* or post-op* or ((post or after or following) adj3 (surger* or surgic* or procedure* or operat* or repair* or laparoscop* or laparotom* or resect* or sutureless*))) adj5 (complicat* or problem* or pain* or chronic* or injury or injuries or vomit* or emes?s or nausea* or readmission* or re-admission* or ((length or duration) adj1 stay*))).tw,kf. | 1656  |
| 17 | exp Recurrence/                                                                                                                                                                                                                                                                                                                                                     | 1715  |
| 18 | (recur* or relaps* or recrud* or reoccur*).tw,kf.                                                                                                                                                                                                                                                                                                                   | 6650  |
| 19 | Patient Readmission/                                                                                                                                                                                                                                                                                                                                                | 135   |
| 20 | or/15-19                                                                                                                                                                                                                                                                                                                                                            | 12717 |

**Appendix 1** to Mohtashami S, Safa N, Guadagno E, et al. Derivation of a complication burden score based on disability-adjusted life years to assess patient burden following surgery: a pilot study. *Can J Surg* 2020.

DOI: 10.1503/cjs.004819

*Online appendices are unedited and posted as supplied by the authors.*

|    |           |    |
|----|-----------|----|
| 21 | 14 and 20 | 12 |
|----|-----------|----|

## Additional Details

---

---

### **Limits**

---

- 2008-current
- Exclude Animals
- Pediatrics
- Exclude case reports, where possible
- English or French

**Appendix 1** to Mohtashami S, Safa N, Guadagno E, et al. Derivation of a complication burden score based on disability-adjusted life years to assess patient burden following surgery: a pilot study. *Can J Surg* 2020.

DOI: 10.1503/cjs.004819

*Online appendices are unedited and posted as supplied by the authors.*

**Box S1.** Calculation of the total DALY-based complication burden score for each postoperative complication

$$\sum_{i=1}^n \text{DALY}_i = (\text{DW}_1 \times \text{I}_1 \times \text{D}_1) + \dots + (\text{DW}_n \times \text{I}_n \times \text{D}_n)$$

Where DW = disability weight and I = incident rate of complication
